# Supplementary material for: Deciphering the photocurrent polarity of Bi2O2Se heterojunction phototransistors to enhance detection performance
Source: Royal Society of Chemistry journal article supplement (doi:10.1039/d1tc02038b), 2021-01-01
Supplement: d1tc02038b1.pdf [file d1tc02038b1.pdf]

## Supporting Materials

### Deciphering Photocurrent Polarity of Bi<sub>2</sub>O<sub>2</sub>Se Heterojunction Phototransistors to Enhance Detection Performance

*Jiayue Han,<sup>a</sup> Xingwei Han,<sup>a</sup> Chaoyi Zhang,<sup>a</sup> Silu Peng,<sup>a</sup> Chao Han,<sup>a</sup> Xingchao Zhang,<sup>a</sup> Xianchao Liu,<sup>a</sup> Xiaoyang Du,<sup>a</sup> Jun Gou<sup>a,b,\*</sup> and Jun Wang<sup>a,b,\*</sup>*

- a. School of Optoelectronic Science and Engineering, University of Electronic Science and Technology of China, Chengdu 610054, China
- b. State Key Laboratory of Electronic Thin Films and Integrated Devices, University of Electronic Science and Technology of China, Chengdu 610054, China

E-mail: goujun@uestc.edu.cn, wjun@uestc.edu.cn

#### **Key words:**

Phototransistors, photocurrent polarity analysis, graphene/Bi<sub>2</sub>O<sub>2</sub>Se heterojunction, tunneling injection, band structure calculation

## 1. The EDS, UPS and absorption spectrum.

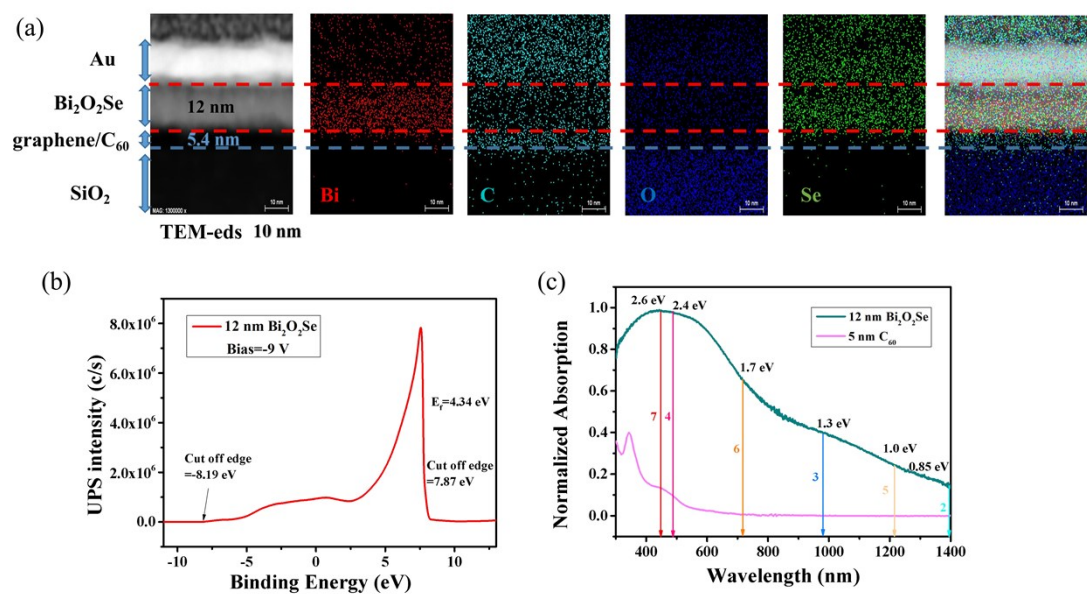

**Fig. S1.** (a) The EDS of our device can distinguish 12 nm  $\text{Bi}_2\text{O}_2\text{Se}$  and 5.4 nm graphene/ $\text{C}_{60}$ . (b) The UPS spectra of bare  $\text{Bi}_2\text{O}_2\text{Se}$  (c) The absorption spectrum of 5 nm  $\text{C}_{60}$  and 12 nm  $\text{Bi}_2\text{O}_2\text{Se}$ , respectively.

## 2. The IV curve of graphene/C<sub>60</sub>/Bi<sub>2</sub>O<sub>2</sub>Se

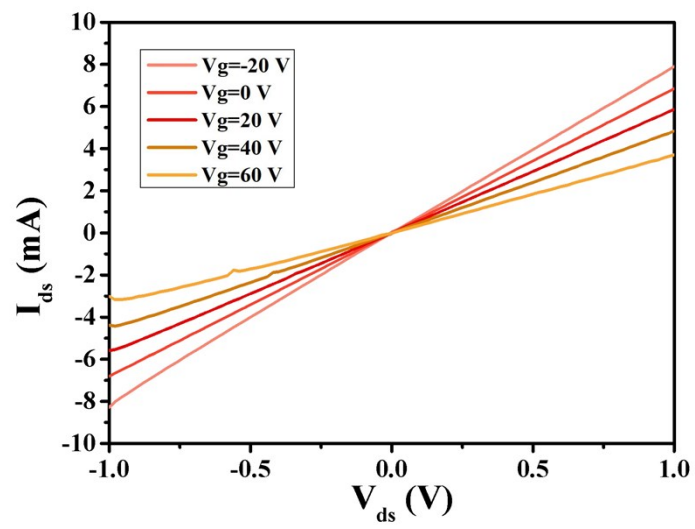

**Fig. S2.** The IV curve as the function of V<sub>g</sub>.

### 3. The polar photocurrent discrimination of graphene/C<sub>60</sub>/Bi<sub>2</sub>O<sub>2</sub>Se

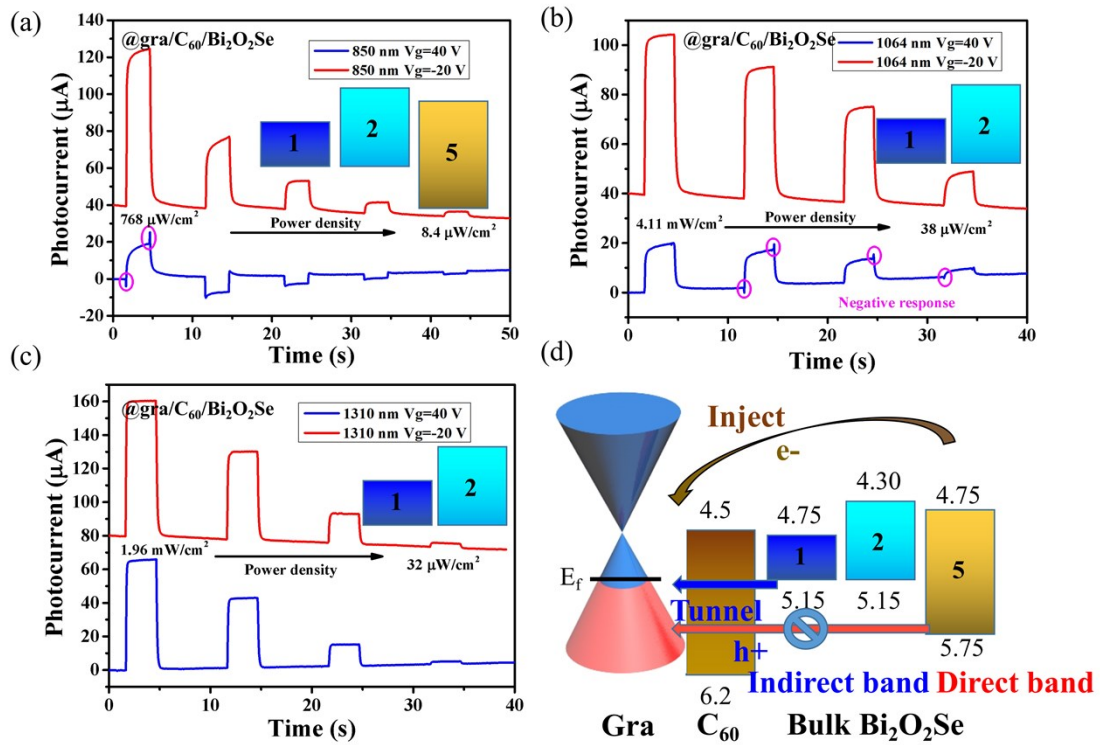

(a,b,c) Transient power dependent photocurrent measurements at wavelengths of 850, 1064 and 1310 nm with 40 V and -20 V V<sub>g</sub> in graphene/C<sub>60</sub>/Bi<sub>2</sub>O<sub>2</sub>Se. (d) Band diagram of graphene/C<sub>60</sub>/Bi<sub>2</sub>O<sub>2</sub>Se.

#### 4. Transient photocurrent measurements at increasing gate voltages (Gra/Bi<sub>2</sub>O<sub>2</sub>Se)

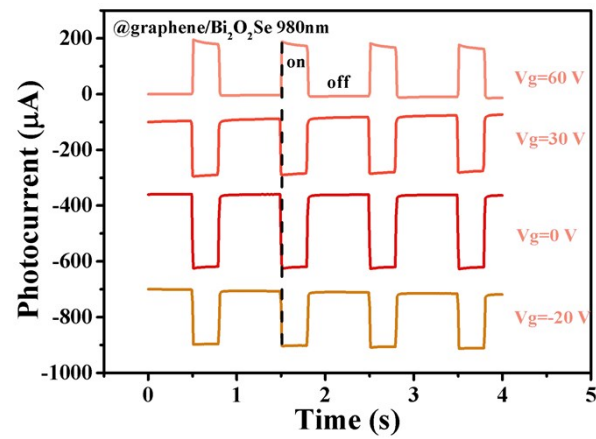

**Fig. S4.** Transient photocurrent measurements at increasing gate voltages in graphene/Bi<sub>2</sub>O<sub>2</sub>Se, the power density=15 mW/cm<sup>2</sup>.

## 5. The noise spectrum and dynamic response time of graphene/Bi<sub>2</sub>O<sub>2</sub>Se

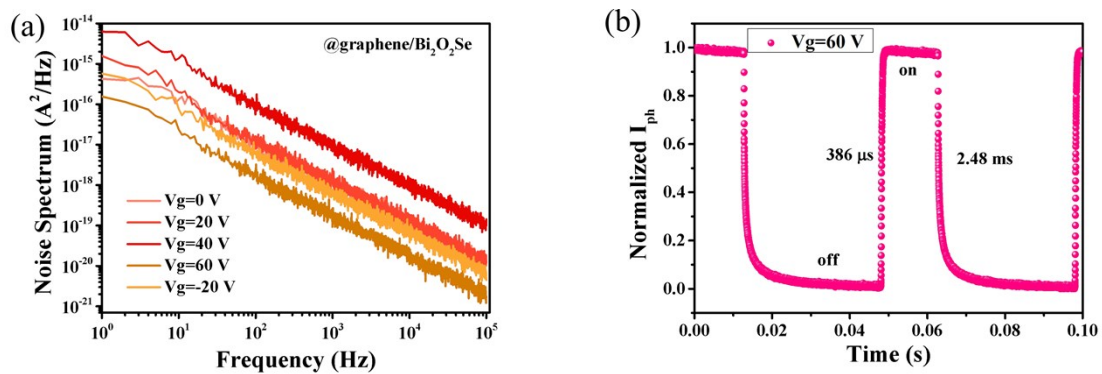

**Fig. S5.** (a) The 1/f noise analysis of the device for different V<sub>g</sub> values. (b) The dynamic response time of graphene/Bi<sub>2</sub>O<sub>2</sub>Se with variation of V<sub>g</sub>= 60 V, interval: 10 μs.

## 6. The photoresponse and noise of graphene/C<sub>60</sub>/Bi<sub>2</sub>O<sub>2</sub>Se and graphene/Bi<sub>2</sub>O<sub>2</sub>Se

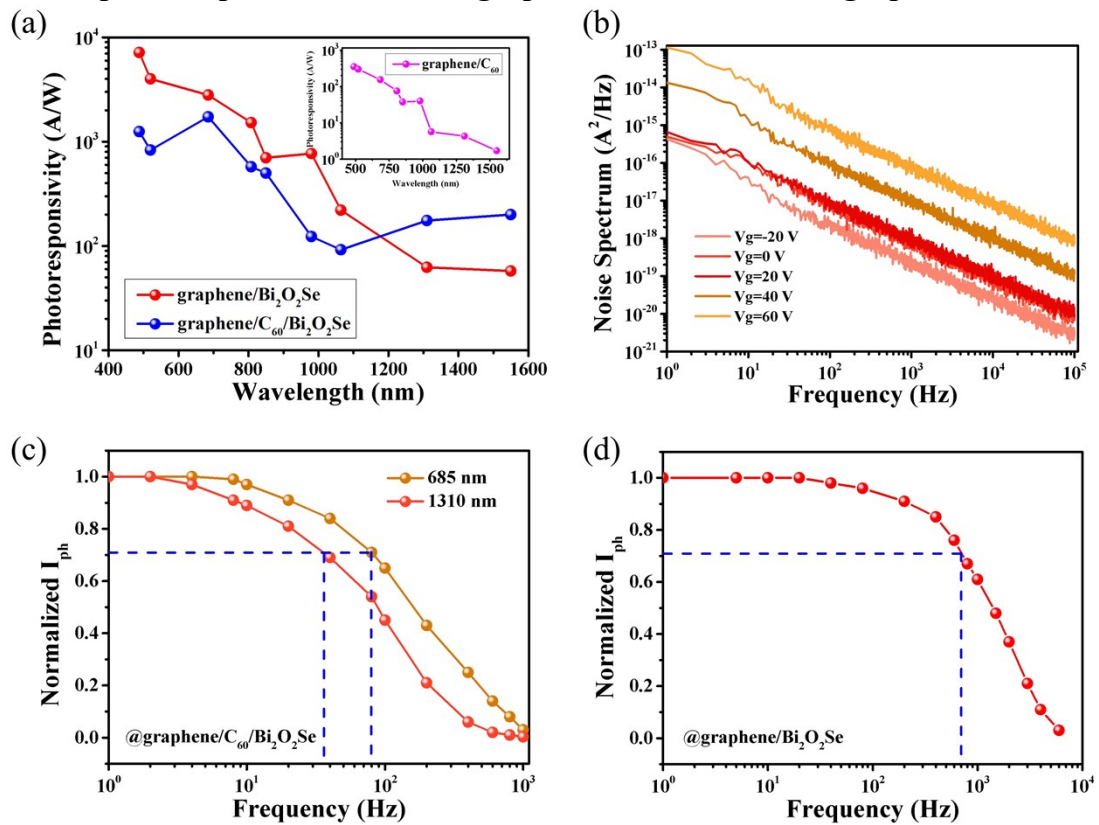

**Fig. S6.** (a) The comparison of spectral photoresponse in graphene/C<sub>60</sub>/Bi<sub>2</sub>O<sub>2</sub>Se and graphene/Bi<sub>2</sub>O<sub>2</sub>Se, the inset is the photoresponse of graphene/C<sub>60</sub>. (b) The 1/f noise analysis of the device for different V<sub>g</sub> values. (c,d) Normalized photo-currents with the variation of operated frequency.

## 7. Thickness dependent performance and response time of graphene/C<sub>60</sub>/Bi<sub>2</sub>O<sub>2</sub>Se

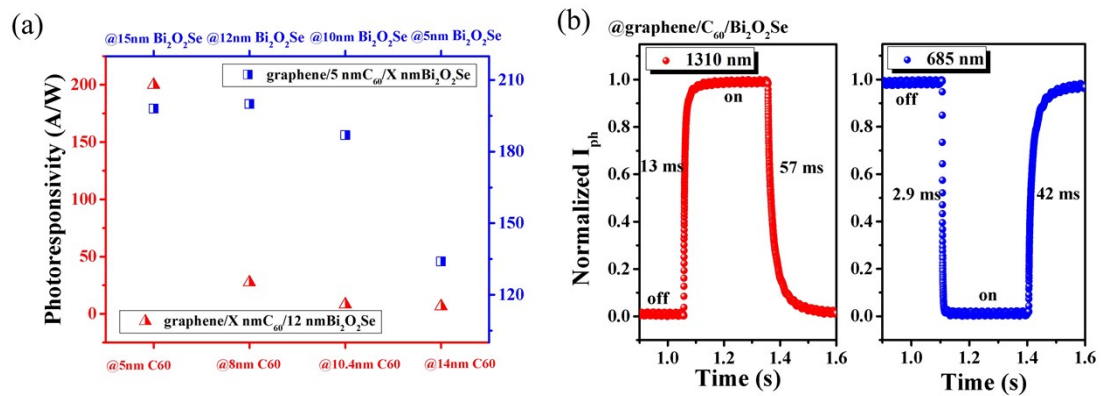

**Fig. S7.** (a) The thickness dependent performance. (b) The response time of graphene/C<sub>60</sub>/Bi<sub>2</sub>O<sub>2</sub>Se with variation of V<sub>g</sub>= 0V



## 8. The stability of graphene/C<sub>60</sub>/Bi<sub>2</sub>O<sub>2</sub>Se

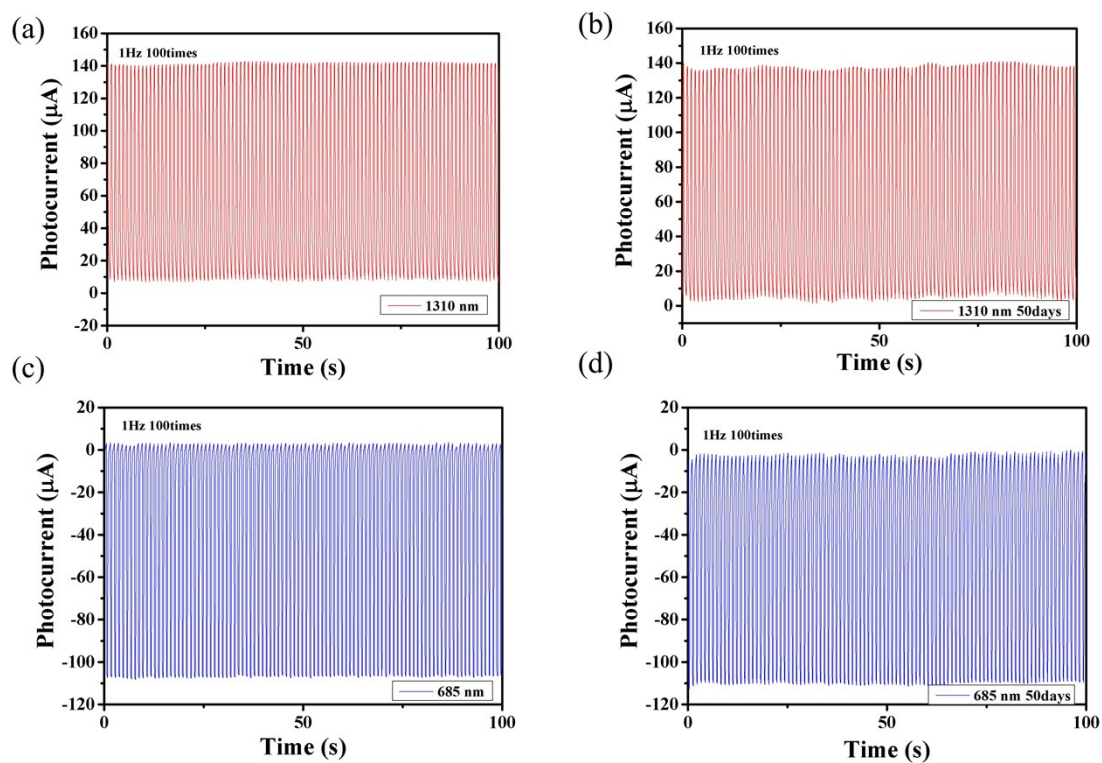

**Fig. S8.** (a,b) The detection stability of graphene/C<sub>60</sub>/Bi<sub>2</sub>O<sub>2</sub>Se at 1310 and 685 nm. (c,d) And after 50 days, the stability of graphene/C<sub>60</sub>/Bi<sub>2</sub>O<sub>2</sub>Se.
